# Supplementary figures and images for: Retracted Article: Panax notoginseng saponins regulate VEGF to suppress esophageal squamous cell carcinoma progression via DVL3-mediated Wnt/β-catenin signaling
Source: Royal Society of Chemistry journal article supplement (doi:10.1039/c9ra07830d), 2020-01-01

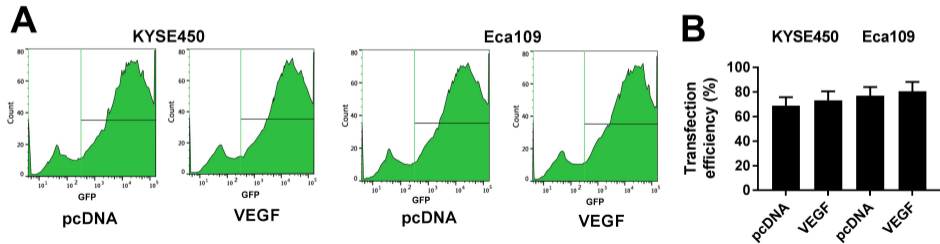

Supplement: c9ra07830d2.pdf [file c9ra07830d2.pdf]
